# Supplementary material for: SARS-CoV-2 in Environmental Samples of Quarantined Households
Source: MDPI journal article supplement (doi:10.3390/v14051075), 2022-05-17
Supplement: s1 [file s1]

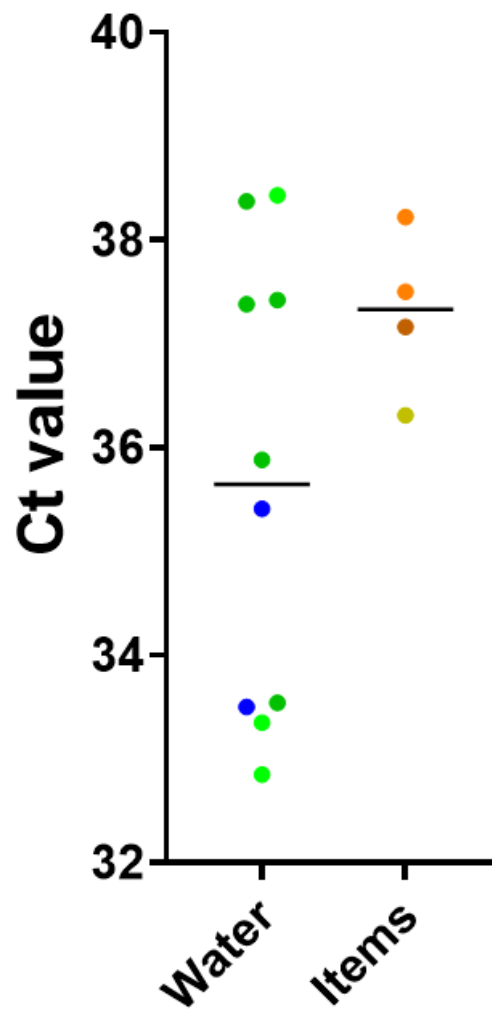

**Figure S1:** Ct values of environmental samples collected in households. The E-gene Ct values of those samples that were positive in SARS-CoV-2 RT-PCR from all samples listed in Table 2 are shown, subdivided by the nature of the samples. Water samples include washbasin (dark green), shower (green), and toilet water (blue), item samples include swabs of a remote control (yellow), 2 door handles (orange), and a stairway railing (brown).
